# Supplementary material for: Understanding rational non-adherence to medications. A discrete choice experiment in a community sample in Australia
Source: PubMed Central journal article supplement (PMC3511288; doi:10.1186/1471-2296-13-61), 2012-06-20
Supplement: 1471-2296-13-61-S1.pdf [file 1471-2296-13-61-S1.pdf]

## Additional File 1 - Description of factors and levels used in the Discrete Choice Experiment

| Factor               | Description                                                                          | Levels <sup>a</sup>                                                                                                                                                               |
|----------------------|--------------------------------------------------------------------------------------|-----------------------------------------------------------------------------------------------------------------------------------------------------------------------------------|
| Medication Harms     |                                                                                      |                                                                                                                                                                                   |
| Immediate            | Severity of <b>current</b> side effects                                              | The severity of daily medication side effects is: 1, 4, 7, 10 (out of 10) <sup>b</sup>                                                                                            |
| Long-term            | Chance of <b>future</b> unwanted medication effects                                  | For every 100 people taking this medication, the number of people who will have unwanted effects in the next 10 years is (this may or may not be you): 5, 35, 65, 95 <sup>c</sup> |
| Medication Benefits  |                                                                                      |                                                                                                                                                                                   |
| Immediate            | Symptom frequency while on the medication ( <b>current</b> )                         | On medication, daily symptoms are now felt: 2, 3, 5, 6 (days/week)                                                                                                                |
| Long-term            | The chance of early death from the illness while on the medication ( <b>future</b> ) | For every 100 people taking this medication, 85 will die in the next 10 years. This may or may not be you. On medication, this number reduces to: 5, 25, 45, 65 <sup>c</sup>      |
| Cost                 | Your monthly cost for this medication:                                               | \$AUS 0, 10, 35, 50 <sup>d</sup>                                                                                                                                                  |
| Symptom Severity     | Symptom severity is                                                                  | 1, 4, 7, 10 (out of 10) <sup>b</sup>                                                                                                                                              |
| Medication Regimen   | The medication is taken:                                                             | 1, 2, 3, 4 (times/day)                                                                                                                                                            |
| Alcohol Restrictions | Can you drink alcohol while on this medication?                                      | Yes, No (Base)                                                                                                                                                                    |

<sup>a</sup> A *priori* expectations were that respondents would prefer the alternative with lower side effect severity, risk of future unwanted medication effects, symptom frequency, risk of death, cost and regimen. No a priori expectations were made regarding symptom severity or alcohol restrictions.

<sup>b</sup> The severity of side effects and symptoms were rated on a common scale and described in terms of the effect on one's ability to perform daily activities

<sup>c</sup> Developed and explained with reference to the International Patient Decision Aids Standards Collaboration (IPDAS) background document [51] and in light of current research surrounding risk presentation in preference elicitation techniques [52].

<sup>d</sup> Levels were centred about the current Australian Pharmaceutical Benefits Schedule general and concession co-payment for 2010 for prescribed medication
