# Supplementary material for: Understanding rational non-adherence to medications. A discrete choice experiment in a community sample in Australia
Source: PubMed Central journal article supplement (PMC3511288; doi:10.1186/1471-2296-13-61), 2012-06-20
Supplement: 1471-2296-13-61-S2.pdf [file 1471-2296-13-61-S2.pdf]

## Additional File 2 - Discrete Choice Experiment results

| Factor                                        |                                                                     |      | $\beta$ Estimate | Standard Error | Lower 95% CI | Upper 95% CI | P      | Relative Importance <sup>a</sup> |
|-----------------------------------------------|---------------------------------------------------------------------|------|------------------|----------------|--------------|--------------|--------|----------------------------------|
| <b>Medication Harms<sup>b</sup></b>           |                                                                     |      |                  |                |              |              |        |                                  |
| <i>Immediate</i>                              | Severity of current side effects                                    | Mean | -0.1569          | 0.0199         | -0.1960      | -0.1178      | <0.001 | 0.242 (2)                        |
|                                               |                                                                     | SD   | 0.1234           | 0.0262         | 0.0719       | 0.1748       | <0.001 |                                  |
| <i>Long-term</i>                              | Chance of future unwanted medication effects                        | Mean | -0.0140          | 0.0021         | -0.0181      | -0.0099      | <0.001 | 0.216 (3)                        |
|                                               |                                                                     | SD   | 0.0134           | 0.0030         | 0.0075       | 0.0192       | <0.001 |                                  |
| <b>Medication Benefits<sup>b</sup></b>        |                                                                     |      |                  |                |              |              |        |                                  |
| <i>Immediate</i>                              | Symptom frequency while on medication (current)                     | Mean | -0.1451          | 0.0336         | -0.2110      | -0.0792      | <0.001 | 0.100 (5)                        |
|                                               |                                                                     | SD   | 0.1764           | 0.0609         | 0.0570       | 0.2958       | <0.01  |                                  |
| <i>Long-term</i>                              | Chance of early death from illness while on the medication (future) | Mean | -0.0301          | 0.0039         | -0.0378      | -0.0223      | <0.001 | 0.309 (1)                        |
|                                               |                                                                     | SD   | 0.0305           | 0.0046         | 0.0215       | 0.0395       | <0.001 |                                  |
| <b>Cost<sup>c</sup></b>                       | With Private Health Insurance                                       | Mean | -0.0064          | 0.0037         | -0.0136      | 0.0008       | 0.08   | 0.130 (4)                        |
|                                               |                                                                     | Mean | -0.0151          | 0.0036         | -0.0222      | -0.0080      | <0.001 |                                  |
| <b>Symptom Severity<sup>c</sup></b>           |                                                                     | Mean | -0.0093          | 0.0149         | -0.0384      | 0.0199       | 0.53   | 0.048 (6)                        |
|                                               |                                                                     | Mean | -0.0937          | 0.0444         | -0.1807      | -0.0068      | 0.03   |                                  |
| <b>Medication Regimen<sup>c</sup></b>         |                                                                     | Mean | -0.0937          | 0.0444         | -0.1807      | -0.0068      | 0.03   |                                  |
| <b>Alcohol Restrictions (Yes)<sup>c</sup></b> |                                                                     | Mean | 0.0758           | 0.0893         | -0.0992      | 0.2508       | 0.40   |                                  |
| <b>Constant<sup>c</sup></b>                   |                                                                     | Mean | 0.0472           | 0.0779         | -0.1055      | 0.1999       | 0.54   |                                  |
| <b>Model Fit Statistics</b>                   |                                                                     |      |                  |                |              |              |        |                                  |
|                                               |                                                                     |      |                  |                | -746.2       |              |        |                                  |
|                                               |                                                                     |      |                  |                | 0.1542       |              |        |                                  |
|                                               |                                                                     |      |                  |                | 1.18         |              |        |                                  |
|                                               |                                                                     |      |                  |                |              |              |        |                                  |

<sup>a</sup> The relative importance of factors and their levels was determined by calculating the coefficient range, which is the difference between the smallest (negative) part worth utility and the largest part-worth utility within the factor levels, and dividing it by the sum of the coefficient ranges for all factors and levels [17, 28]

<sup>b</sup> Random parameter

<sup>c</sup> Non-random parameter
